# Supplementary material for: Sustained treatment of retinal vascular diseases with self-aggregating sunitinib microparticles
Source: PubMed Central journal article supplement (PMC7000758; doi:10.1038/s41467-020-14340-x), 2020-02-04
Supplement: 41467_2020_14340_MOESM2_ESM.pdf [file 41467_2020_14340_MOESM2_ESM.pdf]

## Description of Additional Supplementary Files

**File name:** Supplementary Movie 1

**Description:** Aggregate of sunitinib MPs in rabbit vitreous one day after intravitreal injection of MPs.
